# Supplementary material for: Evaluation of Circulating Platelet Extracellular Vesicles and Hypertension Mediated Organ Damage
Source: MDPI journal article supplement (doi:10.3390/ijms232315150), 2022-12-02
Supplement: s1 [file s1]

## Supplementary material

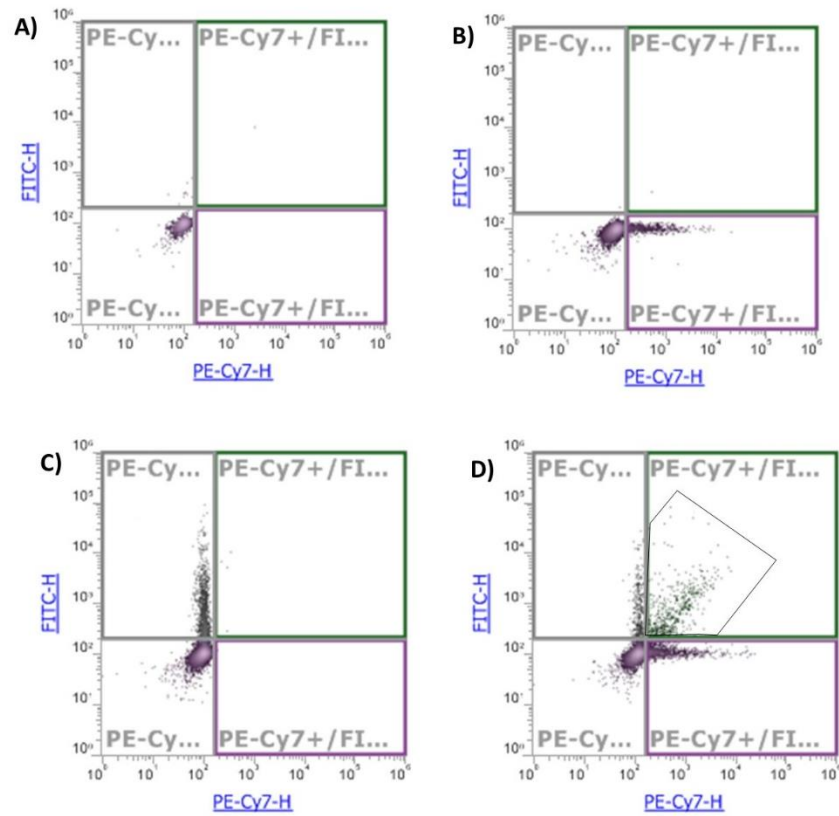

**Figure S1. Gating and acquisition strategy for the detection of circulating extracellular vesicles with flow cytometry. A) Buffer only. B) CD41-PE Cy7 single stain. C) Annexin V-FITC single stain. D) Double staining with CD41-PE Cy7 and Annexin V-FITC.**
